# Supplementary material
Source: publisher figshare collection journal article supplement (https://acs.figshare.com/ndownloader/files/4728016)
Supplement: Supplementary file 1 [file 4728016]

 
data_Cu3ReO4q6c
 
_audit_creation_method            SHELXL-97
_chemical_formula_sum
 'C6.67 H4 Cu N0.67 O2.67 Re0.33'
_chemical_formula_weight          261.71
 
loop_
 _atom_type_symbol
 _atom_type_description
 _atom_type_scat_dispersion_real
 _atom_type_scat_dispersion_imag
 _atom_type_scat_source
 'C'  'C'   0.0033   0.0016
 'International Tables Vol C Tables 4.2.6.8 and 6.1.1.4'
 'H'  'H'   0.0000   0.0000
 'International Tables Vol C Tables 4.2.6.8 and 6.1.1.4'
 'Cu'  'Cu'   0.3201   1.2651
 'International Tables Vol C Tables 4.2.6.8 and 6.1.1.4'
 'N'  'N'   0.0061   0.0033
 'International Tables Vol C Tables 4.2.6.8 and 6.1.1.4'
 'O'  'O'   0.0106   0.0060
 'International Tables Vol C Tables 4.2.6.8 and 6.1.1.4'
 'Re'  'Re'  -1.0185   7.2310
 'International Tables Vol C Tables 4.2.6.8 and 6.1.1.4'
 
_symmetry_cell_setting            monoclinic
_symmetry_space_group_name_H-M    'P 1 21 1'
 
loop_
 _symmetry_equiv_pos_as_xyz
 'x, y, z'
 '-x, y+1/2, -z'
 
_cell_length_a                    8.2533(18)
_cell_length_b                    6.8406(18)
_cell_length_c                    18.256(6)
_cell_angle_alpha                 90.00
_cell_angle_beta                  101.371(15)
_cell_angle_gamma                 90.00
_cell_volume                      1010.4(5)
_cell_formula_units_Z             6
_cell_measurement_temperature     293(2)
 
_exptl_crystal_description        ?
_exptl_crystal_colour             ?
_exptl_crystal_size_max           ?
_exptl_crystal_size_mid           ?
_exptl_crystal_size_min           ?
_exptl_crystal_density_meas       ?
_exptl_crystal_density_diffrn     2.581
_exptl_crystal_density_method     'not measured'
_exptl_crystal_F_000              744
_exptl_absorpt_coefficient_mu     9.140
_exptl_absorpt_correction_type    ?
_exptl_absorpt_correction_T_min   ?
_exptl_absorpt_correction_T_max   ?
_exptl_absorpt_process_details    ?
 
_exptl_special_details
;
 ?
;
 
_diffrn_ambient_temperature       293(2)
_diffrn_radiation_wavelength      0.71073
_diffrn_radiation_type            MoK\a
_diffrn_radiation_source          'fine-focus sealed tube'
_diffrn_radiation_monochromator   graphite
_diffrn_measurement_device_type   ?
_diffrn_measurement_method        ?
_diffrn_detector_area_resol_mean  ?
_diffrn_standards_number          ?
_diffrn_standards_interval_count  ?
_diffrn_standards_interval_time   ?
_diffrn_standards_decay_%         ?
_diffrn_reflns_number             9465
_diffrn_reflns_av_R_equivalents   0.0244
_diffrn_reflns_av_sigmaI/netI     0.0316
_diffrn_reflns_limit_h_min        -10
_diffrn_reflns_limit_h_max        11
_diffrn_reflns_limit_k_min        -8
_diffrn_reflns_limit_k_max        8
_diffrn_reflns_limit_l_min        -24
_diffrn_reflns_limit_l_max        24
_diffrn_reflns_theta_min          2.28
_diffrn_reflns_theta_max          28.84
_reflns_number_total              4614
_reflns_number_gt                 4456
_reflns_threshold_expression      >2sigma(I)
 
_computing_data_collection        ?
_computing_cell_refinement        ?
_computing_data_reduction         ?
_computing_structure_solution     ?
_computing_structure_refinement   'SHELXL-97 (Sheldrick, 1997)'
_computing_molecular_graphics     ?
_computing_publication_material   ?
 
_refine_special_details
;
 Refinement of F^2^ against ALL reflections.  The weighted R-factor wR and
 goodness of fit S are based on F^2^, conventional R-factors R are based
 on F, with F set to zero for negative F^2^. The threshold expression of
 F^2^ > 2sigma(F^2^) is used only for calculating R-factors(gt) etc. and is
 not relevant to the choice of reflections for refinement.  R-factors based
 on F^2^ are statistically about twice as large as those based on F, and R-
 factors based on ALL data will be even larger.
;
 
_refine_ls_structure_factor_coef  Fsqd
_refine_ls_matrix_type            full
_refine_ls_weighting_scheme       calc
_refine_ls_weighting_details
 'calc w=1/[\s^2^(Fo^2^)+(0.0625P)^2^+0.1817P] where P=(Fo^2^+2Fc^2^)/3'
_atom_sites_solution_primary      direct
_atom_sites_solution_secondary    difmap
_atom_sites_solution_hydrogens    geom
_refine_ls_hydrogen_treatment     mixed
_refine_ls_extinction_method      none
_refine_ls_extinction_coef        ?
_refine_ls_abs_structure_details
 'Flack H D (1983), Acta Cryst. A39, 876-881'
_refine_ls_abs_structure_Flack    0.633(8)
_refine_ls_number_reflns          4614
_refine_ls_number_parameters      308
_refine_ls_number_restraints      1
_refine_ls_R_factor_all           0.0301
_refine_ls_R_factor_gt            0.0291
_refine_ls_wR_factor_ref          0.0798
_refine_ls_wR_factor_gt           0.0785
_refine_ls_goodness_of_fit_ref    1.029
_refine_ls_restrained_S_all       1.029
_refine_ls_shift/su_max           0.001
_refine_ls_shift/su_mean          0.000
 
loop_
 _atom_site_label
 _atom_site_type_symbol
 _atom_site_fract_x
 _atom_site_fract_y
 _atom_site_fract_z
 _atom_site_U_iso_or_equiv
 _atom_site_adp_type
 _atom_site_occupancy
 _atom_site_symmetry_multiplicity
 _atom_site_calc_flag
 _atom_site_refinement_flags
 _atom_site_disorder_assembly
 _atom_site_disorder_group
Re1 Re 0.238574(19) 0.70216(7) -0.253759(8) 0.01712(7) Uani 1 1 d . . .
Cu2 Cu 0.60166(8) 0.47323(9) -0.23109(4) 0.02175(15) Uani 1 1 d . . .
Cu4 Cu -0.14727(8) 0.49539(10) -0.29097(4) 0.02249(15) Uani 1 1 d . . .
Cu5 Cu 1.22325(9) 0.57755(13) 0.24094(3) 0.02344(17) Uani 1 1 d . . .
O6 O 1.4846(5) 0.4371(6) 0.6681(2) 0.0223(8) Uani 1 1 d . . .
O7 O 1.7009(5) 0.5090(6) 0.6154(2) 0.0229(8) Uani 1 1 d . . .
O8 O 0.3535(5) 0.5239(7) -0.2008(2) 0.0317(9) Uani 1 1 d . . .
O9 O 0.0829(5) 0.6025(6) -0.3213(2) 0.0295(9) Uani 1 1 d . . .
O12 O 0.9688(5) 0.4680(6) -0.1895(2) 0.0239(8) Uani 1 1 d . . .
O13 O 0.7467(5) 0.5140(6) -0.1380(2) 0.0238(8) Uani 1 1 d . . .
O14 O 0.3700(6) 0.8391(7) -0.2963(3) 0.0309(10) Uani 1 1 d . . .
O15 O 0.1551(6) 0.8544(7) -0.1955(3) 0.0265(10) Uani 1 1 d . . .
N2 N 1.1335(6) 0.5821(7) 0.3287(3) 0.0203(9) Uani 1 1 d . . .
N3 N 1.3137(6) 0.5630(7) 0.1533(3) 0.0219(10) Uani 1 1 d . . .
C1 C 1.1657(7) 0.5593(8) 0.4636(3) 0.0180(10) Uani 1 1 d . . .
C2 C 1.2721(7) 0.5285(8) 0.5341(3) 0.0181(10) Uani 1 1 d . . .
H2 H 1.2299 0.5316 0.5777 0.022 Uiso 1 1 calc R . .
C4 C 1.5023(7) 0.4821(8) 0.4727(3) 0.0208(11) Uani 1 1 d . . .
H4 H 1.6146 0.4596 0.4761 0.025 Uiso 1 1 calc R . .
C5 C 1.3995(7) 0.5037(8) 0.4032(3) 0.0194(10) Uani 1 1 d . . .
H5 H 1.4419 0.4895 0.3599 0.023 Uiso 1 1 calc R . .
C6 C 1.5505(7) 0.4766(7) 0.6136(3) 0.0168(10) Uani 1 1 d . . .
C9 C 1.5497(8) 0.6020(9) 0.0953(3) 0.0283(13) Uani 1 1 d . . .
H9 H 1.6626 0.6253 0.1017 0.034 Uiso 1 1 calc R . .
C10 C 1.2143(7) 0.5415(7) 0.0832(3) 0.0173(10) Uani 1 1 d . . .
C11 C 1.2837(7) 0.5467(7) 0.0176(3) 0.0176(10) Uani 1 1 d . . .
C12 C 1.0426(7) 0.5173(8) 0.0763(3) 0.0210(11) Uani 1 1 d . . .
H12 H 0.9967 0.5102 0.1188 0.025 Uiso 1 1 calc R . .
C14 C 0.9021(7) 0.6432(9) 0.3879(3) 0.0257(12) Uani 1 1 d . . .
H14 H 0.7908 0.6750 0.3825 0.031 Uiso 1 1 calc R . .
C15 C 1.4748(8) 0.5919(9) 0.1576(3) 0.0257(12) Uani 1 1 d . . .
H15 H 1.5413 0.6063 0.2048 0.031 Uiso 1 1 calc R . .
C16 C 1.1784(7) 0.5264(8) -0.0531(3) 0.0180(10) Uani 1 1 d . . .
H16 H 1.2228 0.5240 -0.0961 0.022 Uiso 1 1 calc R . .
C17 C 1.0100(7) 0.5101(8) -0.0583(3) 0.0176(10) Uani 1 1 d . . .
C18 C 0.9429(7) 0.5042(8) 0.0067(3) 0.0196(10) Uani 1 1 d . . .
H18 H 0.8293 0.4913 0.0026 0.023 Uiso 1 1 calc R . .
C19 C 0.9747(7) 0.6318(9) 0.3255(3) 0.0242(11) Uani 1 1 d . . .
H19 H 0.9099 0.6601 0.2790 0.029 Uiso 1 1 calc R . .
C20 C 0.9956(8) 0.6074(8) 0.4578(3) 0.0231(12) Uani 1 1 d . . .
H20 H 0.9489 0.6144 0.5001 0.028 Uiso 1 1 calc R . .
C21 C 1.4367(7) 0.4943(7) 0.5376(3) 0.0178(10) Uani 1 1 d . . .
C22 C 1.4573(8) 0.5779(9) 0.0254(3) 0.0245(12) Uani 1 1 d . . .
H22 H 1.5061 0.5817 -0.0164 0.029 Uiso 1 1 calc R . .
C23 C 0.8999(7) 0.4954(8) -0.1342(3) 0.0184(10) Uani 1 1 d . . .
C24 C 1.2310(7) 0.5472(8) 0.3983(3) 0.0177(10) Uani 1 1 d . . .
 
loop_
 _atom_site_aniso_label
 _atom_site_aniso_U_11
 _atom_site_aniso_U_22
 _atom_site_aniso_U_33
 _atom_site_aniso_U_23
 _atom_site_aniso_U_13
 _atom_site_aniso_U_12
Re1 0.01584(10) 0.02484(11) 0.01153(10) -0.00046(10) 0.00480(7) -0.00037(12)
Cu2 0.0152(3) 0.0357(4) 0.0135(3) 0.0011(3) 0.0008(2) 0.0014(3)
Cu4 0.0151(3) 0.0375(4) 0.0138(3) -0.0024(3) 0.0004(2) -0.0020(3)
Cu5 0.0295(4) 0.0316(4) 0.0087(3) 0.0004(3) 0.0025(3) 0.0012(3)
O6 0.0167(19) 0.036(2) 0.0129(18) 0.0012(16) -0.0007(14) 0.0006(16)
O7 0.018(2) 0.0331(19) 0.0151(18) 0.0027(16) -0.0022(15) 0.0002(17)
O8 0.026(2) 0.052(3) 0.0188(19) 0.0082(19) 0.0074(16) 0.0128(19)
O9 0.025(2) 0.046(2) 0.0181(19) -0.0061(18) 0.0048(16) -0.0039(18)
O12 0.0177(19) 0.037(2) 0.0163(18) -0.0042(16) 0.0004(15) -0.0053(16)
O13 0.0164(19) 0.034(2) 0.0195(19) -0.0022(17) 0.0001(15) 0.0006(16)
O14 0.030(2) 0.034(2) 0.034(3) 0.001(2) 0.018(2) -0.0038(19)
O15 0.028(2) 0.033(2) 0.022(2) -0.0046(18) 0.0139(18) 0.0044(18)
N2 0.024(2) 0.022(2) 0.014(2) 0.0002(16) 0.0015(18) 0.0001(17)
N3 0.022(2) 0.031(2) 0.011(2) -0.0007(17) -0.0008(18) 0.0038(19)
C1 0.021(3) 0.020(2) 0.013(2) -0.0025(18) 0.002(2) -0.0015(19)
C2 0.024(3) 0.021(2) 0.010(2) -0.0013(18) 0.005(2) -0.002(2)
C4 0.020(3) 0.022(3) 0.021(3) 0.000(2) 0.007(2) 0.005(2)
C5 0.026(3) 0.020(2) 0.013(2) 0.0010(19) 0.007(2) 0.000(2)
C6 0.019(3) 0.018(2) 0.013(2) -0.0024(18) 0.0010(19) 0.0005(18)
C9 0.021(3) 0.040(3) 0.021(3) 0.003(3) -0.001(2) 0.007(2)
C10 0.023(3) 0.018(2) 0.011(2) -0.0005(18) 0.0023(19) 0.0009(19)
C11 0.019(3) 0.019(2) 0.014(2) 0.0014(19) 0.001(2) 0.0015(19)
C12 0.026(3) 0.025(2) 0.013(2) -0.001(2) 0.006(2) -0.001(2)
C14 0.018(3) 0.033(3) 0.024(3) -0.003(2) -0.003(2) 0.002(2)
C15 0.024(3) 0.034(3) 0.015(2) 0.000(2) -0.006(2) 0.005(2)
C16 0.022(3) 0.026(2) 0.008(2) 0.0013(18) 0.0052(19) 0.000(2)
C17 0.019(3) 0.019(2) 0.012(2) -0.0059(19) -0.0033(19) -0.0009(19)
C18 0.021(3) 0.023(2) 0.015(2) 0.000(2) 0.007(2) -0.003(2)
C19 0.021(3) 0.030(2) 0.017(3) -0.001(2) -0.008(2) -0.001(2)
C20 0.023(3) 0.029(3) 0.019(3) -0.003(2) 0.005(2) -0.001(2)
C21 0.021(3) 0.018(2) 0.012(2) 0.0028(19) -0.002(2) -0.0007(19)
C22 0.018(3) 0.040(3) 0.016(3) 0.003(2) 0.003(2) 0.006(2)
C23 0.022(3) 0.022(2) 0.010(2) 0.0004(19) 0.0012(19) -0.003(2)
C24 0.026(3) 0.021(2) 0.007(2) -0.0011(17) 0.005(2) -0.0028(19)
 
_geom_special_details
;
 All esds (except the esd in the dihedral angle between two l.s. planes)
 are estimated using the full covariance matrix.  The cell esds are taken
 into account individually in the estimation of esds in distances, angles
 and torsion angles; correlations between esds in cell parameters are only
 used when they are defined by crystal symmetry.  An approximate (isotropic)
 treatment of cell esds is used for estimating esds involving l.s. planes.
;
 
loop_
 _geom_bond_atom_site_label_1
 _geom_bond_atom_site_label_2
 _geom_bond_distance
 _geom_bond_site_symmetry_2
 _geom_bond_publ_flag
Re1 O8 1.721(4) . ?
Re1 O15 1.726(4) . ?
Re1 O14 1.729(5) . ?
Re1 O9 1.735(4) . ?
Cu2 O13 1.897(4) . ?
Cu2 O6 1.919(4) 1_454 ?
Cu2 O8 2.251(4) . ?
Cu2 Cu4 2.5308(12) 1_655 ?
Cu4 O7 1.912(4) 1_354 ?
Cu4 O12 1.919(4) 1_455 ?
Cu4 O9 2.206(4) . ?
Cu4 Cu2 2.5308(12) 1_455 ?
Cu5 N2 1.893(5) . ?
Cu5 N3 1.897(5) . ?
O6 C6 1.253(6) . ?
O6 Cu2 1.919(4) 1_656 ?
O7 C6 1.255(7) . ?
O7 Cu4 1.912(4) 1_756 ?
O12 C23 1.267(7) . ?
O12 Cu4 1.919(4) 1_655 ?
O13 C23 1.259(7) . ?
N2 C19 1.344(8) . ?
N2 C24 1.383(7) . ?
N3 C15 1.331(8) . ?
N3 C10 1.385(6) . ?
C1 C24 1.405(7) . ?
C1 C20 1.426(8) . ?
C1 C2 1.424(7) . ?
C2 C21 1.367(8) . ?
C4 C5 1.388(7) . ?
C4 C21 1.399(8) . ?
C5 C24 1.407(8) . ?
C6 C21 1.520(7) . ?
C9 C22 1.363(8) . ?
C9 C15 1.399(9) . ?
C10 C12 1.407(8) . ?
C10 C11 1.425(7) . ?
C11 C16 1.414(7) . ?
C11 C22 1.428(8) . ?
C12 C18 1.373(8) . ?
C14 C20 1.376(8) . ?
C14 C19 1.390(8) . ?
C16 C17 1.379(8) . ?
C17 C18 1.406(7) . ?
C17 C23 1.503(7) . ?
 
loop_
 _geom_angle_atom_site_label_1
 _geom_angle_atom_site_label_2
 _geom_angle_atom_site_label_3
 _geom_angle
 _geom_angle_site_symmetry_1
 _geom_angle_site_symmetry_3
 _geom_angle_publ_flag
O8 Re1 O15 108.9(2) . . ?
O8 Re1 O14 108.1(2) . . ?
O15 Re1 O14 108.2(3) . . ?
O8 Re1 O9 111.7(2) . . ?
O15 Re1 O9 110.2(2) . . ?
O14 Re1 O9 109.6(2) . . ?
O13 Cu2 O6 171.17(17) . 1_454 ?
O13 Cu2 O8 101.58(16) . . ?
O6 Cu2 O8 86.87(16) 1_454 . ?
O13 Cu2 Cu4 87.29(12) . 1_655 ?
O6 Cu2 Cu4 83.89(12) 1_454 1_655 ?
O8 Cu2 Cu4 163.55(11) . 1_655 ?
O7 Cu4 O12 169.10(18) 1_354 1_455 ?
O7 Cu4 O9 101.79(17) 1_354 . ?
O12 Cu4 O9 89.07(16) 1_455 . ?
O7 Cu4 Cu2 86.62(13) 1_354 1_455 ?
O12 Cu4 Cu2 82.70(12) 1_455 1_455 ?
O9 Cu4 Cu2 161.29(11) . 1_455 ?
N2 Cu5 N3 177.9(2) . . ?
C6 O6 Cu2 121.2(4) . 1_656 ?
C6 O7 Cu4 119.0(4) . 1_756 ?
Re1 O8 Cu2 113.46(19) . . ?
Re1 O9 Cu4 120.38(19) . . ?
C23 O12 Cu4 122.5(4) . 1_655 ?
C23 O13 Cu2 118.9(3) . . ?
C19 N2 C24 118.0(5) . . ?
C19 N2 Cu5 120.6(4) . . ?
C24 N2 Cu5 121.3(4) . . ?
C15 N3 C10 118.3(5) . . ?
C15 N3 Cu5 119.7(4) . . ?
C10 N3 Cu5 121.7(4) . . ?
C24 C1 C20 119.2(5) . . ?
C24 C1 C2 119.2(5) . . ?
C20 C1 C2 121.6(5) . . ?
C21 C2 C1 119.8(5) . . ?
C5 C4 C21 119.9(5) . . ?
C4 C5 C24 120.0(5) . . ?
O6 C6 O7 126.8(5) . . ?
O6 C6 C21 117.1(5) . . ?
O7 C6 C21 116.1(5) . . ?
C22 C9 C15 120.1(6) . . ?
N3 C10 C12 119.8(5) . . ?
N3 C10 C11 120.7(5) . . ?
C12 C10 C11 119.5(5) . . ?
C16 C11 C22 121.9(5) . . ?
C16 C11 C10 119.2(5) . . ?
C22 C11 C10 118.8(5) . . ?
C18 C12 C10 120.0(5) . . ?
C20 C14 C19 119.8(5) . . ?
N3 C15 C9 123.7(5) . . ?
C17 C16 C11 120.0(5) . . ?
C16 C17 C18 120.2(5) . . ?
C16 C17 C23 119.1(5) . . ?
C18 C17 C23 120.6(5) . . ?
C12 C18 C17 121.0(5) . . ?
N2 C19 C14 123.6(5) . . ?
C14 C20 C1 118.3(5) . . ?
C2 C21 C4 121.2(5) . . ?
C2 C21 C6 119.0(5) . . ?
C4 C21 C6 119.8(5) . . ?
C9 C22 C11 118.4(5) . . ?
O13 C23 O12 125.1(5) . . ?
O13 C23 C17 117.5(5) . . ?
O12 C23 C17 117.4(5) . . ?
N2 C24 C5 118.9(5) . . ?
N2 C24 C1 121.2(5) . . ?
C5 C24 C1 119.8(5) . . ?
 
_diffrn_measured_fraction_theta_max    0.923
_diffrn_reflns_theta_full              28.84
_diffrn_measured_fraction_theta_full   0.923
_refine_diff_density_max    2.090
_refine_diff_density_min   -1.930
_refine_diff_density_rms    0.156
